# Supplementary material for: Reversible photoluminescence switching behavior and luminescence thermochromism of copper(I) halide cluster coordination polymers
Source: Royal Society of Chemistry journal article supplement (doi:10.1039/c5ra05157f), 2015-01-01
Supplement: c5ra05157f1.pdf [file c5ra05157f1.pdf]

## Supporting Information

### Reversible photoluminescence switching behavior and luminescence thermochromism of copper (I) halide cluster coordination polymers

Guang Zeng, Shanghua Xing, Xu Han, Bingjing Xin, Yulin Yang, Xiuru Wang, Guanghua Li,\* Zhan Shi, and Shouhua Feng

#### Synthesis of 4-Aza-1-azoniabicyclo[2.2.2]octane, 1,1'-(1,4-butanediyl)bis-,dibromide (L)

Ligand (L) is synthesized by adopting the procedure reported Asim Bhaumik et.al with slight modifications [1]. Diazobicyclo[2,2,2]octane (90.0 mmol, 10 g) was dissolved in 200 mL acetone under vigorous stirring. Then 1, 4-Dibromobutane (20.0 mmol, 4.32 g) was added dropwise and the reaction was carried out at room temperature for 36 h. at last the white solid was filtered, washed with acetone and ethyl acetate.

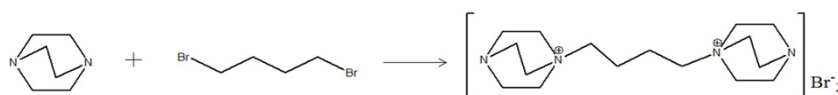

[1] M. Sasidharan a, A. Bhaumik, Phys. Chem. Chem. Phys., 2011, 13, 16282–16294.

Table S1. Selected bond lengths (Å) in 1 and 2 at two different temperatures (K).

| Bond          | 1 (298K)   | 1 (120K)   |
|---------------|------------|------------|
| I(1)-Cu(2)#1  | 2.6879(13) | 2.6859(11) |
| I(1)-Cu(2)    | 2.6879(13) | 2.6859(11) |
| I(1)-Cu(1)    | 2.7589(19) | 2.7286(15) |
| I(2)-Cu(2)    | 2.5935(11) | 2.5894(10) |
| I(2)-Cu(1)    | 2.7037(10) | 2.6987(8)  |
| I(3)-Cu(2)#2  | 2.6832(14) | 2.6809(12) |
| I(3)-Cu(2)#3  | 2.6832(14) | 2.6809(12) |
| I(3)-Cu(1)    | 2.7609(18) | 2.7530(14) |
| Cu(1)-I(2)#1  | 2.7037(10) | 2.6987(8)  |
| Cu(1)-Cu(2)   | 2.7641(17) | 2.7384(14) |
| Cu(1)-Cu(2)#1 | 2.7641(17) | 2.7384(14) |
| Cu(2)-N(2)    | 2.124(5)   | 2.121(5)   |
| Cu(2)-Cu(2)#1 | 2.5747(17) | 2.5625(16) |
| Cu(2)-I(3)#4  | 2.6832(13) | 2.6809(12) |

Symmetry codes: #1 -x+1/2,y,z; #2 x,y-1/2,z+1/2; #3 -x+1/2,y-1/2,z+1/2; #4 x,y+1/2,z-1/2  
#5 -x+1,-y+2,z ; #6 -x+1,-y+1,z

| Bond          | 2 (298K)  | 2 (120K)   |
|---------------|-----------|------------|
| I(1)-Cu(2)    | 2.656(2)  | 2.6397(19) |
| I(1)-Cu(3)    | 2.730(3)  | 2.716(2)   |
| I(1)-Cu(1)    | 2.796(3)  | 2.775(2)   |
| I(2)-Cu(2)    | 2.615(2)  | 2.6180(19) |
| I(2)-Cu(1)    | 2.711(3)  | 2.696(2)   |
| I(3)-Cu(3)    | 2.628(3)  | 2.628(2)   |
| I(3)-Cu(1)    | 2.642(3)  | 2.636(2)   |
| Br(1)-Cu(2)   | 2.594(3)  | 2.580(2)   |
| Br(1)-Cu(1)#1 | 2.627(3)  | 2.629(2)   |
| Br(1)-Cu(3)   | 2.628(3)  | 2.631(2)   |
| Cu(1)-Cu(2)   | 2.621(3)  | 2.587(2)   |
| Cu(1)-Br(1)#2 | 2.627(3)  | 2.629(2)   |
| Cu(1)-Cu(3)   | 2.689(3)  | 2.652(2)   |
| Cu(2)-N(2)    | 2.129(13) | 2.111(12)  |
| Cu(2)-Cu(3)   | 2.672(3)  | 2.654(3)   |
| Cu(3)-N(3)    | 2.07(2)   | 2.004(12)  |

Symmetry codes: #1 -x+1/2,y-1/2,z ; #2 -x+1/2,y+1/2,z ; #3 -x,-y,-z

**Table S2. Comparison of bond lengths (Å) changing in the cooper (I) halide cluster of compound 1 and 2 at two different temperatures (K).**

| Bond          | 1 (298K)   | 1 (120K)   | $\Delta_{\text{bond length}}$ |
|---------------|------------|------------|-------------------------------|
| I(1)-Cu(2)#1  | 2.6879(13) | 2.6859(11) | 0.002                         |
| I(1)-Cu(2)    | 2.6879(13) | 2.6859(11) | 0.002                         |
| I(1)-Cu(1)    | 2.7589(19) | 2.7286(15) | 0.0303                        |
| I(2)-Cu(2)    | 2.5935(11) | 2.5894(10) | 0.0041                        |
| I(2)-Cu(1)    | 2.7037(10) | 2.6987(8)  | 0.005                         |
| I(3)-Cu(2)#2  | 2.6832(14) | 2.6809(12) | 0.0023                        |
| I(3)-Cu(2)#3  | 2.6832(14) | 2.6809(12) | 0.0023                        |
| I(3)-Cu(1)    | 2.7609(18) | 2.7530(14) | 0.0079                        |
| Cu(1)-I(2)#1  | 2.7037(10) | 2.6987(8)  | 0.005                         |
| Cu(2)-I(3)#4  | 2.6832(13) | 2.6809(12) | 0.0023                        |
| Cu(1)-Cu(2)   | 2.7641(17) | 2.7384(14) | 0.0257                        |
| Cu(1)-Cu(2)#1 | 2.7641(17) | 2.7384(14) | 0.0257                        |
| Cu(2)-Cu(2)#1 | 2.5747(17) | 2.5625(16) | 0.0122                        |
| Bond          | 2 (298K)   | 2 (120K)   | $\Delta_{\text{bond length}}$ |
| I(1)-Cu(2)    | 2.656(2)   | 2.6397(19) | 0.0163                        |
| I(1)-Cu(3)    | 2.730(3)   | 2.716(2)   | 0.014                         |
| I(1)-Cu(1)    | 2.796(3)   | 2.775(2)   | 0.021                         |
| I(2)-Cu(2)    | 2.615(2)   | 2.6180(19) | <b>-0.003</b>                 |
| I(2)-Cu(1)    | 2.711(3)   | 2.696(2)   | 0.015                         |
| I(3)-Cu(3)    | 2.628(3)   | 2.628(2)   | <b>0</b>                      |
| I(3)-Cu(1)    | 2.642(3)   | 2.636(2)   | 0.006                         |

|                      |          |          |               |
|----------------------|----------|----------|---------------|
| <b>Br(1)-Cu(2)</b>   | 2.594(3) | 2.580(2) | 0.014         |
| <b>Br(1)-Cu(1)#1</b> | 2.627(3) | 2.629(2) | <b>-0.002</b> |
| <b>Br(1)-Cu(3)</b>   | 2.628(3) | 2.631(2) | <b>-0.003</b> |
| <b>Cu(1)-Br(1)#2</b> | 2.627(3) | 2.629(2) | <b>-0.002</b> |
| <b>Cu(1)-Cu(2)</b>   | 2.621(3) | 2.587(2) | 0.034         |
| <b>Cu(1)-Cu(3)</b>   | 2.689(3) | 2.652(2) | 0.037         |

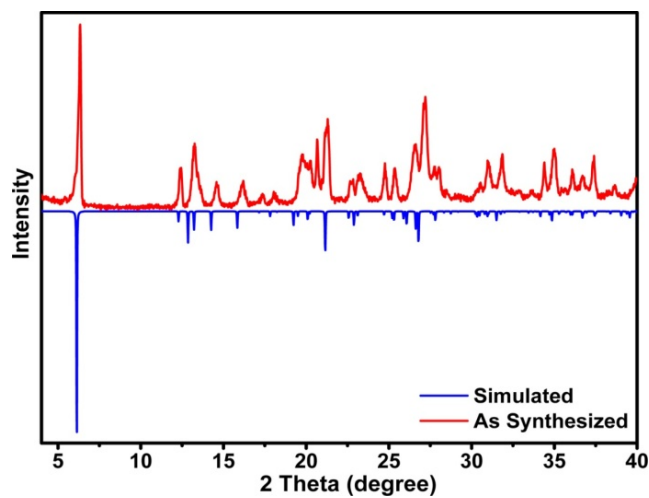

**Figure S1.** The XRD patterns of sample 1.

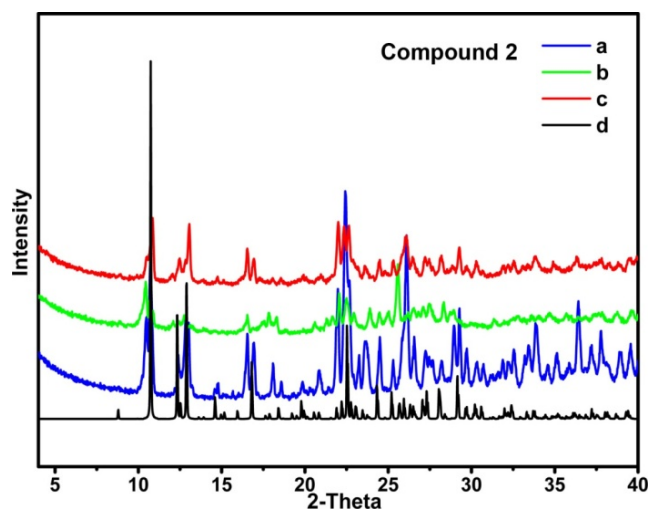

**Figure S2.** The XRD patterns for sample 2 and 2a: a) sample 2; b) sample 2a; c) sample 2a immersed in  $\text{CH}_3\text{CN}$  for 24 h; (d) simulated

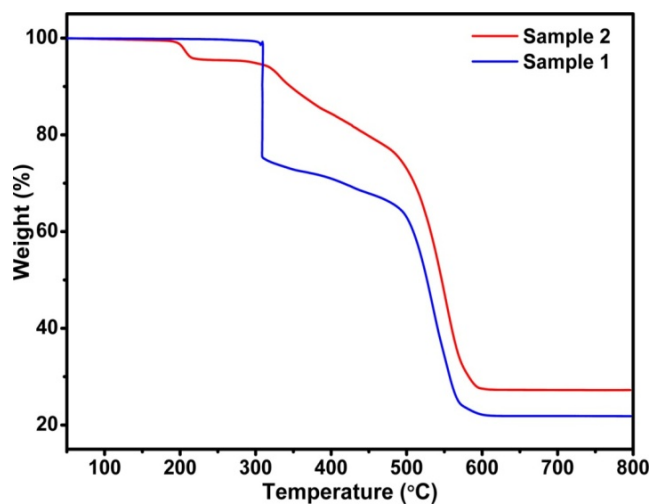

**Figure S3.** The TG of sample 1 and 2. The first sharp mass loss of sample 2 is about 4.42% at 240 °C (calc 4.93%).

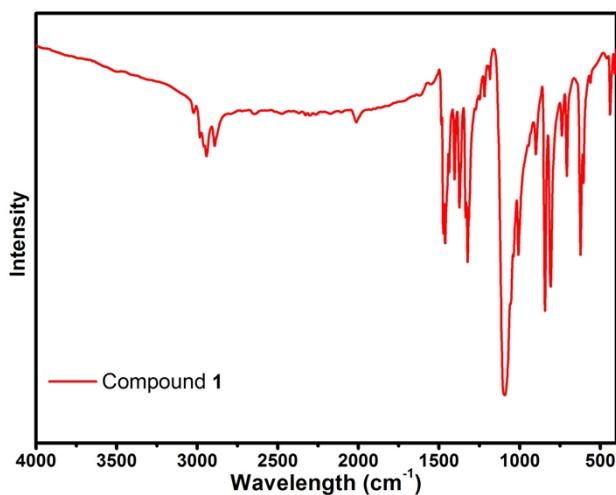

**Figure S4.** The IR spectra of sample 1

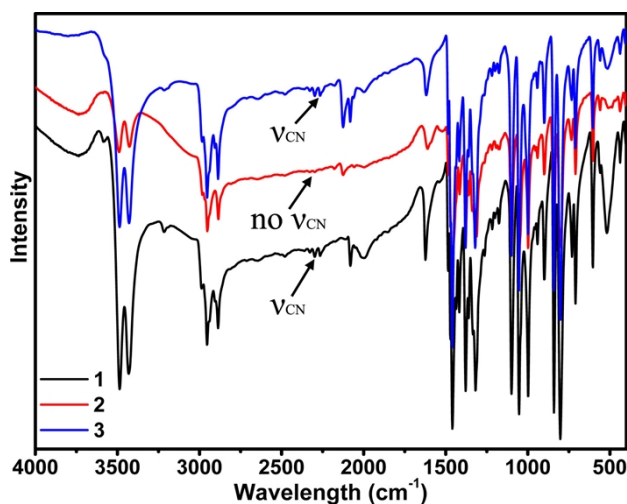

**Figure S5.** The IR spectra of sample 2 and 2a; 1) sample 2; 2) sample 2a; 3) sample 2a immersed in CH<sub>3</sub>CN for 24 h.

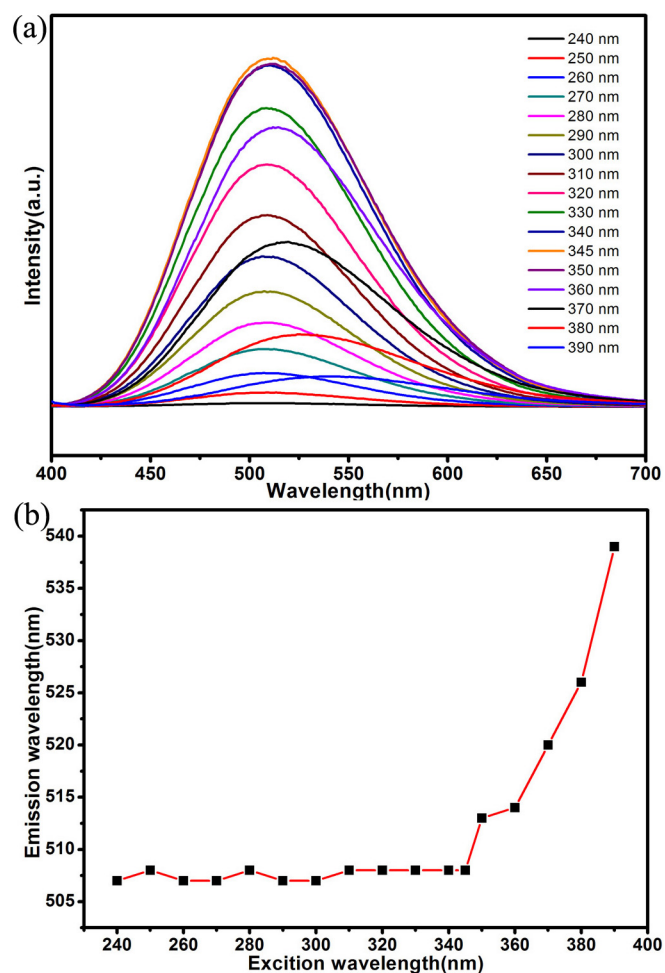

**Figure S6.** (a) The emission spectra of compound **1** under different excitation. (b) Corresponding emission peak position of each excitation.

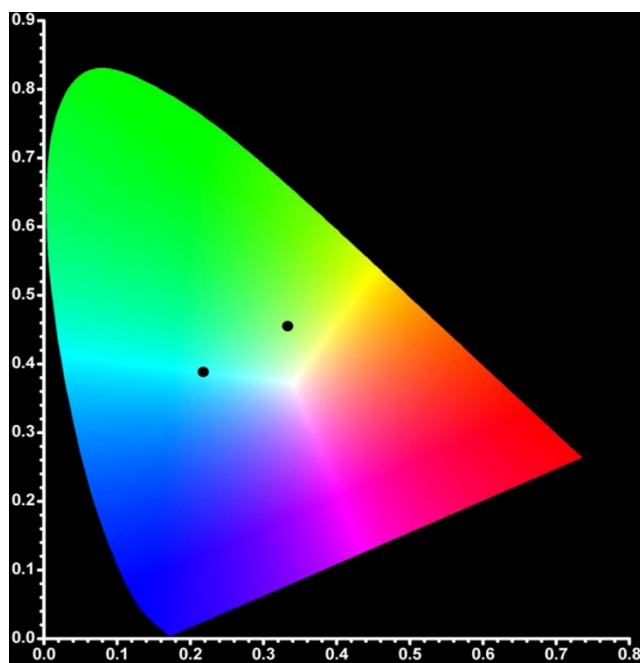

**Figure S7.** Corresponding calculated CIE coordinate of **2** and **2a** at room temperature.

**Table S3. Pattern Indexing Results of 2a<sup>#</sup>**

| fm  | fn     | P | R       | C | S.G.(#)   | a      | b       | c      | < $\alpha$ > | < $\beta$ > | < $\gamma$ > | Vol.   |
|-----|--------|---|---------|---|-----------|--------|---------|--------|--------------|-------------|--------------|--------|
| 32  | 24     | 0 | 3       | O | Pbca (61) | 14.256 | 13.807  | 20.027 | 90.0         | 90.0        | 90.0         | 3942.2 |
| @   | 2T(o)  |   | (h k l) |   | 2T(c)     | Delta  | d(c)    | d(o)   | Del-d        |             | I%           |        |
| [ ] | 8.938  |   | (0 0 2) |   | 8.824     | -0.115 | 10.0135 | 9.8851 | 0.1285       |             | 5.6          |        |
| [ ] | -----  |   | (1 1 1) |   | 9.944     | ---    | 8.8880  | ---    | ---          |             |              |        |
| [ ] | 10.713 |   | (1 0 2) |   | 10.788    | 0.075  | 8.1942  | 8.2513 | -0.0571      |             | 32.9         |        |
| [ ] | 12.438 |   | (2 0 0) |   | 12.407    | -0.031 | 7.1282  | 7.1107 | 0.0175       |             | 14.2         |        |
| [ ] | -----  |   | (1 1 2) |   | 12.551    | ---    | 7.0467  | ---    | ---          |             |              |        |
| [ ] | 12.815 |   | (0 2 0) |   | 12.812    | -0.003 | 6.9037  | 6.9021 | 0.0016       |             | 25.5         |        |
| [ ] | -----  |   | (0 2 1) |   | 13.556    | ---    | 6.5268  | ---    | ---          |             |              |        |
| [ ] | 13.985 |   | (2 1 0) |   | 13.970    | -0.015 | 6.3339  | 6.3272 | 0.0067       |             | 5.1          |        |
| [ ] | -----  |   | (2 1 1) |   | 14.656    | ---    | 6.0391  | ---    | ---          |             |              |        |
| [ ] | -----  |   | (1 2 1) |   | 14.916    | ---    | 5.9344  | ---    | ---          |             |              |        |
| [ ] | -----  |   | (2 0 2) |   | 15.245    | ---    | 5.8071  | ---    | ---          |             |              |        |
| [ ] | -----  |   | (0 2 2) |   | 15.578    | ---    | 5.6838  | ---    | ---          |             |              |        |
| [ ] | -----  |   | (1 1 3) |   | 15.990    | ---    | 5.5381  | ---    | ---          |             |              |        |
| [ ] | 16.541 |   | (2 1 2) |   | 16.547    | 0.006  | 5.3530  | 5.3547 | -0.0018      |             | 27.4         |        |
| [ ] | -----  |   | (1 2 2) |   | 16.778    | ---    | 5.2797  | ---    | ---          |             |              |        |
| [ ] | 17.542 |   | (0 0 4) |   | 17.700    | 0.158  | 5.0068  | 5.0514 | -0.0446      |             | 17.7         |        |
| [ ] | 17.840 |   | (2 2 0) |   | 17.871    | 0.032  | 4.9591  | 4.9679 | -0.0088      |             | 31.2         |        |
| [ ] | 18.300 |   | (2 2 1) |   | 18.416    | 0.116  | 4.8137  | 4.8439 | -0.0302      |             | 23.1         |        |
| [ ] | -----  |   | (0 2 3) |   | 18.473    | ---    | 4.7990  | ---    | ---          |             |              |        |
| [ ] | 18.831 |   | (1 0 4) |   | 18.769    | -0.062 | 4.7239  | 4.7085 | 0.0154       |             | 5.4          |        |
| [ ] | -----  |   | (2 1 3) |   | 19.301    | ---    | 4.5948  | ---    | ---          |             |              |        |
| [ ] | -----  |   | (1 2 3) |   | 19.501    | ---    | 4.5482  | ---    | ---          |             |              |        |
| [ ] | -----  |   | (1 1 4) |   | 19.848    | ---    | 4.4696  | ---    | ---          |             |              |        |
| [ ] | -----  |   | (2 2 2) |   | 19.963    | ---    | 4.4440  | ---    | ---          |             |              |        |
| [ ] | -----  |   | (3 1 1) |   | 20.237    | ---    | 4.3844  | ---    | ---          |             |              |        |
| [ ] | 20.598 |   | (3 0 2) |   | 20.672    | 0.073  | 4.2932  | 4.3083 | -0.0151      |             | 13.5         |        |
| [ ] | -----  |   | (1 3 1) |   | 20.742    | ---    | 4.2787  | ---    | ---          |             |              |        |
| [ ] | 21.642 |   | (3 1 2) |   | 21.659    | 0.017  | 4.0996  | 4.1028 | -0.0032      |             | 13.8         |        |
| [ ] | -----  |   | (2 0 4) |   | 21.673    | ---    | 4.0971  | ---    | ---          |             |              |        |
| [ ] | -----  |   | (0 2 4) |   | 21.911    | ---    | 4.0531  | ---    | ---          |             |              |        |
| [ ] | 22.062 |   | (1 3 2) |   | 22.134    | 0.072  | 4.0128  | 4.0257 | -0.0128      |             | 53.5         |        |
| [ ] | -----  |   | (2 2 3) |   | 22.314    | ---    | 3.9809  | ---    | ---          |             |              |        |
| [ ] | 22.499 |   | (2 1 4) |   | 22.619    | 0.120  | 3.9278  | 3.9485 | -0.0207      |             | 46.5         |        |
| [ ] | -----  |   | (1 2 4) |   | 22.791    | ---    | 3.8986  | ---    | ---          |             |              |        |
| [ ] | 22.942 |   | (2 3 0) |   | 22.982    | 0.041  | 3.8665  | 3.8733 | -0.0067      |             | 16.1         |        |
| [ ] | -----  |   | (3 2 1) |   | 23.133    | ---    | 3.8417  | ---    | ---          |             |              |        |
| [ ] | -----  |   | (2 3 1) |   | 23.413    | ---    | 3.7964  | ---    | ---          |             |              |        |
| [ ] | -----  |   | (3 1 3) |   | 23.851    | ---    | 3.7277  | ---    | ---          |             |              |        |
| [ ] | 23.900 |   | (1 1 5) |   | 23.940    | 0.040  | 3.7140  | 3.7201 | -0.0061      |             | 32.9         |        |
| [ ] | -----  |   | (1 3 3) |   | 24.285    | ---    | 3.6620  | ---    | ---          |             |              |        |
| [ ] | 24.478 |   | (3 2 2) |   | 24.395    | -0.083 | 3.6458  | 3.6335 | 0.0122       |             | 22.8         |        |
| [ ] | -----  |   | (2 3 2) |   | 24.661    | ---    | 3.6070  | ---    | ---          |             |              |        |

---

|     |        |          |        |        |        |        |         |       |
|-----|--------|----------|--------|--------|--------|--------|---------|-------|
| [ ] | 25.035 | ( 4 0 0) | 24.963 | -0.073 | 3.5641 | 3.5539 | 0.0102  | 22.0  |
| [ ] | -----  | ( 2 2 4) | 25.256 | ---    | 3.5234 | ---    | ---     |       |
| [ ] | 25.580 | ( 0 2 5) | 25.692 | 0.112  | 3.4645 | 3.4794 | -0.0149 | 100.0 |
| [ ] | -----  | ( 0 4 0) | 25.788 | ---    | 3.4518 | ---    | ---     |       |
| [ ] | -----  | ( 4 1 0) | 25.795 | ---    | 3.4510 | ---    | ---     |       |
| [ ] | -----  | ( 3 0 4) | 25.827 | ---    | 3.4468 | ---    | ---     |       |
| [ ] | 26.175 | ( 0 4 1) | 26.175 | 0.001  | 3.4017 | 3.4018 | -0.0001 | 11.0  |
| [ ] | -----  | ( 4 1 1) | 26.182 | ---    | 3.4009 | ---    | ---     |       |
| [ ] | -----  | ( 2 1 5) | 26.304 | ---    | 3.3853 | ---    | ---     |       |
| [ ] | -----  | ( 3 2 3) | 26.372 | ---    | 3.3767 | ---    | ---     |       |
| [ ] | -----  | ( 1 2 5) | 26.453 | ---    | 3.3665 | ---    | ---     |       |
| [ ] | 26.536 | ( 4 0 2) | 26.524 | -0.012 | 3.3578 | 3.3563 | 0.0015  | 13.8  |
| [ ] | -----  | ( 2 3 3) | 26.620 | ---    | 3.3458 | ---    | ---     |       |
| [ ] | -----  | ( 3 1 4) | 26.634 | ---    | 3.3442 | ---    | ---     |       |
| [ ] | -----  | ( 0 0 6) | 26.685 | ---    | 3.3378 | ---    | ---     |       |
| [ ] | -----  | ( 1 4 1) | 26.924 | ---    | 3.3088 | ---    | ---     |       |
| [ ] | 27.099 | ( 1 3 4) | 27.026 | -0.074 | 3.2965 | 3.2877 | 0.0088  | 21.5  |
| [ ] | -----  | ( 0 4 2) | 27.306 | ---    | 3.2634 | ---    | ---     |       |
| [ ] | -----  | ( 4 1 2) | 27.312 | ---    | 3.2627 | ---    | ---     |       |
| [ ] | -----  | ( 3 3 1) | 27.318 | ---    | 3.2619 | ---    | ---     |       |
| [ ] | 27.461 | ( 1 0 6) | 27.421 | -0.041 | 3.2500 | 3.2453 | 0.0047  | 25.6  |
| [ ] | -----  | ( 1 4 2) | 28.026 | ---    | 3.1811 | ---    | ---     |       |
| [ ] | -----  | ( 4 2 0) | 28.154 | ---    | 3.1670 | ---    | ---     |       |
| [ ] | -----  | ( 1 1 6) | 28.185 | ---    | 3.1635 | ---    | ---     |       |
| [ ] | 28.338 | ( 3 3 2) | 28.406 | 0.068  | 3.1394 | 3.1468 | -0.0074 | 32.6  |
| [ ] | -----  | ( 4 2 1) | 28.511 | ---    | 3.1281 | ---    | ---     |       |
| [ ] | -----  | ( 2 2 5) | 28.624 | ---    | 3.1160 | ---    | ---     |       |
| [ ] | -----  | ( 2 4 0) | 28.711 | ---    | 3.1067 | ---    | ---     |       |
| [ ] | 28.939 | ( 3 2 4) | 28.929 | -0.010 | 3.0838 | 3.0828 | 0.0010  | 23.9  |
| [ ] | -----  | ( 2 4 1) | 29.062 | ---    | 3.0700 | ---    | ---     |       |
| [ ] | -----  | ( 0 4 3) | 29.099 | ---    | 3.0662 | ---    | ---     |       |
| [ ] | -----  | ( 4 1 3) | 29.105 | ---    | 3.0656 | ---    | ---     |       |
| [ ] | 29.239 | ( 2 3 4) | 29.157 | -0.082 | 3.0602 | 3.0518 | 0.0084  | 7.5   |
| [ ] | -----  | ( 2 0 6) | 29.526 | ---    | 3.0229 | ---    | ---     |       |
| [ ] | -----  | ( 4 2 2) | 29.559 | ---    | 3.0196 | ---    | ---     |       |
| [ ] | -----  | ( 0 2 6) | 29.705 | ---    | 3.0050 | ---    | ---     |       |
| [ ] | -----  | ( 1 4 3) | 29.780 | ---    | 2.9976 | ---    | ---     |       |
| [ ] | -----  | ( 3 1 5) | 29.858 | ---    | 2.9900 | ---    | ---     |       |
| [ ] | 30.019 | ( 2 4 2) | 30.092 | 0.073  | 2.9672 | 2.9743 | -0.0071 | 5.9   |
| [ ] | -----  | ( 3 3 3) | 30.140 | ---    | 2.9627 | ---    | ---     |       |
| [ ] | -----  | ( 1 3 5) | 30.211 | ---    | 2.9558 | ---    | ---     |       |
| [ ] | -----  | ( 2 1 6) | 30.241 | ---    | 2.9529 | ---    | ---     |       |
| [ ] | -----  | ( 1 2 6) | 30.373 | ---    | 2.9404 | ---    | ---     |       |
| [ ] | -----  | ( 4 0 4) | 30.768 | ---    | 2.9036 | ---    | ---     |       |
| [ ] | 31.340 | ( 4 2 3) | 31.234 | -0.106 | 2.8613 | 2.8519 | 0.0095  | 12.5  |
| [ ] | -----  | ( 0 4 4) | 31.453 | ---    | 2.8419 | ---    | ---     |       |

---

---

|            |          |        |        |        |        |         |      |
|------------|----------|--------|--------|--------|--------|---------|------|
| [ ]-----   | ( 4 1 4) | 31.458 | ---    | 2.8414 | ---    | ---     |      |
| [ ]-----   | ( 4 3 0) | 31.727 | ---    | 2.8180 | ---    | ---     |      |
| [ ]-----   | ( 2 4 3) | 31.742 | ---    | 2.8167 | ---    | ---     |      |
| [ ] 31.961 | ( 3 2 5) | 31.941 | -0.019 | 2.7995 | 2.7979 | 0.0016  | 5.6  |
| [ ]-----   | ( 4 3 1) | 32.048 | ---    | 2.7905 | ---    | ---     |      |
| [ ]-----   | ( 1 4 4) | 32.088 | ---    | 2.7871 | ---    | ---     |      |
| [ ]-----   | ( 2 3 5) | 32.150 | ---    | 2.7819 | ---    | ---     |      |
| [ ]-----   | ( 2 2 6) | 32.303 | ---    | 2.7690 | ---    | ---     |      |
| [ ]-----   | ( 3 4 1) | 32.339 | ---    | 2.7661 | ---    | ---     |      |
| [ ]-----   | ( 5 1 1) | 32.344 | ---    | 2.7656 | ---    | ---     |      |
| [ ] 32.484 | ( 3 3 4) | 32.425 | -0.059 | 2.7589 | 2.7540 | 0.0049  | 8.1  |
| [ ]-----   | ( 1 1 7) | 32.546 | ---    | 2.7489 | ---    | ---     |      |
| [ ]-----   | ( 5 0 2) | 32.627 | ---    | 2.7423 | ---    | ---     |      |
| [ ] 32.781 | ( 3 0 6) | 32.760 | -0.020 | 2.7314 | 2.7297 | 0.0017  | 10.7 |
| [ ]-----   | ( 4 3 2) | 32.994 | ---    | 2.7126 | ---    | ---     |      |
| [ ]-----   | ( 3 4 2) | 33.277 | ---    | 2.6901 | ---    | ---     |      |
| [ ]-----   | ( 5 1 2) | 33.282 | ---    | 2.6897 | ---    | ---     |      |
| [ ]-----   | ( 1 5 1) | 33.323 | ---    | 2.6866 | ---    | ---     |      |
| [ ]-----   | ( 3 1 6) | 33.414 | ---    | 2.6795 | ---    | ---     |      |
| [ ]-----   | ( 4 2 4) | 33.452 | ---    | 2.6765 | ---    | ---     |      |
| [ ] 33.624 | ( 1 3 6) | 33.733 | 0.110  | 2.6548 | 2.6632 | -0.0084 | 9.8  |
| [ ]-----   | ( 0 2 7) | 33.888 | ---    | 2.6430 | ---    | ---     |      |
| [ ] 34.035 | ( 2 4 4) | 33.931 | -0.105 | 2.6398 | 2.6319 | 0.0079  | 9.1  |
| [ ]-----   | ( 1 5 2) | 34.237 | ---    | 2.6169 | ---    | ---     |      |
| [ ]-----   | ( 0 4 5) | 34.265 | ---    | 2.6148 | ---    | ---     |      |
| [ ]-----   | ( 4 1 5) | 34.270 | ---    | 2.6144 | ---    | ---     |      |
| [ ]-----   | ( 5 2 1) | 34.292 | ---    | 2.6128 | ---    | ---     |      |
| [ ]-----   | ( 2 1 7) | 34.366 | ---    | 2.6074 | ---    | ---     |      |
| [ ]-----   | ( 1 2 7) | 34.483 | ---    | 2.5988 | ---    | ---     |      |
| [ ]-----   | ( 4 3 3) | 34.519 | ---    | 2.5961 | ---    | ---     |      |
| [ ] 34.681 | ( 3 4 3) | 34.792 | 0.111  | 2.5764 | 2.5844 | -0.0080 | 14.1 |
| [ ]-----   | ( 5 1 3) | 34.797 | ---    | 2.5761 | ---    | ---     |      |
| [ ]-----   | ( 2 5 0) | 34.812 | ---    | 2.5750 | ---    | ---     |      |
| [ ]-----   | ( 1 4 5) | 34.855 | ---    | 2.5719 | ---    | ---     |      |
| [ ]-----   | ( 2 5 1) | 35.108 | ---    | 2.5540 | ---    | ---     |      |
| [ ]-----   | ( 3 3 5) | 35.168 | ---    | 2.5497 | ---    | ---     |      |
| [ ]-----   | ( 5 2 2) | 35.184 | ---    | 2.5486 | ---    | ---     |      |
| [ ]-----   | ( 3 2 6) | 35.309 | ---    | 2.5398 | ---    | ---     |      |
| [ ]-----   | ( 2 3 6) | 35.500 | ---    | 2.5266 | ---    | ---     |      |
| [ ] 35.699 | ( 1 5 3) | 35.716 | 0.017  | 2.5118 | 2.5130 | -0.0012 | 13.3 |
| [ ]-----   | ( 0 0 8) | 35.841 | ---    | 2.5034 | ---    | ---     |      |
| [ ] 35.991 | ( 2 5 2) | 35.982 | -0.008 | 2.4939 | 2.4933 | 0.0006  | 8.4  |
| [ ]-----   | ( 4 2 5) | 36.126 | ---    | 2.4843 | ---    | ---     |      |
| [ ]-----   | ( 4 4 0) | 36.197 | ---    | 2.4796 | ---    | ---     |      |
| [ ]-----   | ( 2 2 7) | 36.218 | ---    | 2.4782 | ---    | ---     |      |
| [ ]-----   | ( 5 0 4) | 36.225 | ---    | 2.4777 | ---    | ---     |      |

---



---

|     |        |          |        |        |        |        |         |      |
|-----|--------|----------|--------|--------|--------|--------|---------|------|
| [ ] | 36.417 | ( 1 0 8) | 36.408 | -0.009 | 2.4657 | 2.4651 | 0.0006  | 6.3  |
| [ ] | -----  | ( 4 4 1) | 36.483 | ---    | 2.4608 | ---    | ---     |      |
| [ ] | -----  | ( 4 3 4) | 36.561 | ---    | 2.4557 | ---    | ---     |      |
| [ ] | -----  | ( 2 4 5) | 36.574 | ---    | 2.4549 | ---    | ---     |      |
| [ ] | -----  | ( 5 2 3) | 36.630 | ---    | 2.4513 | ---    | ---     |      |
| [ ] | -----  | ( 3 4 4) | 36.820 | ---    | 2.4390 | ---    | ---     |      |
| [ ] | -----  | ( 5 1 4) | 36.825 | ---    | 2.4387 | ---    | ---     |      |
| [ ] | 36.860 | ( 4 0 6) | 36.863 | 0.003  | 2.4363 | 2.4365 | -0.0002 | 6.8  |
| [ ] | -----  | ( 1 1 8) | 37.005 | ---    | 2.4273 | ---    | ---     |      |
| [ ] | -----  | ( 3 1 7) | 37.226 | ---    | 2.4134 | ---    | ---     |      |
| [ ] | 37.322 | ( 4 4 2) | 37.330 | 0.008  | 2.4069 | 2.4074 | -0.0005 | 10.3 |
| [ ] | -----  | ( 5 3 1) | 37.339 | ---    | 2.4063 | ---    | ---     |      |
| [ ] | -----  | ( 2 5 3) | 37.401 | ---    | 2.4025 | ---    | ---     |      |
| [ ] | -----  | ( 0 4 6) | 37.449 | ---    | 2.3995 | ---    | ---     |      |
| [ ] | -----  | ( 4 1 6) | 37.453 | ---    | 2.3992 | ---    | ---     |      |
| [ ] | -----  | ( 1 3 7) | 37.517 | ---    | 2.3953 | ---    | ---     |      |
| [ ] | -----  | ( 1 5 4) | 37.701 | ---    | 2.3840 | ---    | ---     |      |
| [ ] | 37.841 | ( 6 0 0) | 37.832 | -0.009 | 2.3761 | 2.3755 | 0.0005  | 15.1 |
| [ ] | -----  | ( 3 5 1) | 37.919 | ---    | 2.3708 | ---    | ---     |      |
| [ ] | -----  | ( 1 4 6) | 37.996 | ---    | 2.3662 | ---    | ---     |      |
| [ ] | -----  | ( 2 0 8) | 38.067 | ---    | 2.3620 | ---    | ---     |      |
| [ ] | -----  | ( 5 3 2) | 38.170 | ---    | 2.3558 | ---    | ---     |      |
| [ ] | -----  | ( 0 2 8) | 38.210 | ---    | 2.3534 | ---    | ---     |      |
| [ ] | -----  | ( 3 3 6) | 38.287 | ---    | 2.3489 | ---    | ---     |      |
| [ ] | -----  | ( 6 1 0) | 38.410 | ---    | 2.3417 | ---    | ---     |      |
| [ ] | -----  | ( 5 2 4) | 38.574 | ---    | 2.3320 | ---    | ---     |      |
| [ ] | -----  | ( 2 1 8) | 38.641 | ---    | 2.3281 | ---    | ---     |      |
| [ ] | -----  | ( 6 1 1) | 38.682 | ---    | 2.3258 | ---    | ---     |      |
| [ ] | -----  | ( 4 4 3) | 38.706 | ---    | 2.3244 | ---    | ---     |      |
| [ ] | -----  | ( 3 5 2) | 38.739 | ---    | 2.3225 | ---    | ---     |      |
| [ ] | 38.759 | ( 1 2 8) | 38.748 | -0.012 | 2.3220 | 2.3213 | 0.0007  | 16.4 |
| [ ] | -----  | ( 6 0 2) | 38.924 | ---    | 2.3119 | ---    | ---     |      |
| [ ] | -----  | ( 3 2 7) | 38.960 | ---    | 2.3098 | ---    | ---     |      |
| [ ] | -----  | ( 4 3 5) | 39.050 | ---    | 2.3047 | ---    | ---     |      |
| [ ] | -----  | ( 0 6 0) | 39.112 | ---    | 2.3012 | ---    | ---     |      |
| [ ] | -----  | ( 2 3 7) | 39.136 | ---    | 2.2999 | ---    | ---     |      |
| [ ] | -----  | ( 4 2 6) | 39.179 | ---    | 2.2974 | ---    | ---     |      |
| [ ] | -----  | ( 3 4 5) | 39.295 | ---    | 2.2909 | ---    | ---     |      |
| [ ] | -----  | ( 5 1 5) | 39.300 | ---    | 2.2907 | ---    | ---     |      |
| [ ] | -----  | ( 2 5 4) | 39.313 | ---    | 2.2899 | ---    | ---     |      |
| [ ] | -----  | ( 0 6 1) | 39.380 | ---    | 2.2862 | ---    | ---     |      |
| [ ] | -----  | ( 6 1 2) | 39.488 | ---    | 2.2801 | ---    | ---     |      |
| [ ] | -----  | ( 5 3 3) | 39.521 | ---    | 2.2783 | ---    | ---     |      |
| [ ] | 39.583 | ( 2 4 6) | 39.597 | 0.014  | 2.2741 | 2.2749 | -0.0008 | 15.8 |
| [ ] | -----  | ( 1 6 1) | 39.904 | ---    | 2.2573 | ---    | ---     |      |

---

#: calculated by **JADE.5**.
